# Supplementary material for: Investigating Microplastic Presence Amongst Grey Seals (Halichoerus Grypus) of the North Sea
Source: Research Square preprint supplement (doi:10.21203/rs.3.rs-139356/v1), 2021-01-07
Supplement: Supplementary file 1 [file 9017e5251d4d5081cfd1b08f.docx]

**Investigating microplastic presence amongst grey seals (*Halichoerus grypus*) of the North Sea**

Lucas Desclos-Dukes1*, Dr Tristan Cogan1, Dr Andrew Butterworth2

University of Bristol, Bristol Veterinary School, Langford, Bristol, BS40 5DU, United Kingdom.

2 OP Vet Services, 14 Stonewell Lane, Congresbury, Bristol, BS49 5DL, United Kingdom. Andrew Butterworth is a Veterinarian and independent researcher.

**Corresponding and lead author: email address –* [Ld15135@bristol.ac.uk](mailto:Ld15135@bristol.ac.uk)

**SUPPLEMENTARY INFORMATION**

**Table S1.** Features (size, type and colour) of the microplastics identified across all scat subsamples.

| Sample number | Microplastic size (µm) | Type of microplastic | Colour of microplastic |
| --- | --- | --- | --- |
| 1 | 500 | Fragment | Clear |
| 400 | Fibre | Blue |
| 1200 | Fibre | Blue |
| 2 | 100 | Fragment | Blue |
| 3 | 600 | Fibre | Blue |
| 4 | 1600 | Fibre | Black |
| 200 | Fragment | Light blue |
| 2000 | Fibre | Red |
| 5 | NO MICROPLASTICS FOUND | | |
| 6 | 400 | Fibre | Blue |
| 1500 | Fibre | Black |
| 7 | 1000 | Fibre | Black |
| 8 | 200 | Fragment | Blue |
| 9 | 500 | Fibre | Blue |
| 10 | 400 | Fibre | Light blue |
| 500 | Fibre | Blue |
| 11 | 100 | Fibre | Red |
| 1000 | Fibre | Black |
| 12 | NO MICROPLASTICS FOUND | | |
| 13 | NO MICROPLASTICS FOUND | | |
| 14 | 2000 | Fibre | Blue |
| 600 | Fragment | Clear |
| 15 | 400 | Fragment | Clear |
| 16 | 1100 | Fibre | Blue |
| 17 | NO MICROPLASTICS FOUND | | |
| 18 | 200 | Fragment | Clear |
| 300 | Fragment | Clear |
| 100 | Fragment | Light blue |
| 19 | 200 | Fragment | Clear |
| 1700 | Fibre | Black |
| 20 | NO MICROPLASTICS FOUND | | |
| 21 | 50 | Fragment | Light blue |
| 22 | 500 | Fibre | Black |
| 600 | Fibre | Blue |
| 23 | NO MICROPLASTICS FOUND | | |
| 24 | NO MICROPLASTICS FOUND | | |
| 25 | 2300 | Fibre | Red |
| 26 | 600 | Fibre | Red |
| 80 | Fragment | Light blue |
| 27 | 1400 | Fragment | Light blue |
| 100 | Fragment | Light blue |
| 28 | NO MICROPLASTICS FOUND | | |
| 29 | 200 | Fragment | Light blue |
| 30 | 1200 | Fibre | Blue |
| 2800 | Fibre | Blue |
| 31 | 1500 | Fibre | Blue |
| 2000 | Fibre | Black |
| 32 | 200 | Fibre | Black |
| 33 | 100 | Fragment | Clear |
| 80 | Fragment | Clear |
| 30 | Fragment | Light blue |
| 34 | 200 | Fragment | Light blue |
| 35 | NO MICROPLASTICS FOUND | | |
| 36 | 400 | Fibre | Black |
| 300 | Fibre | Black |
| 37 | NO MICROPLASTICS FOUND | | |
| 38 | 2000 | Fibre | Blue |
| 1600 | Fibre | Blue |
| 700 | Fibre | Black |
| 1800 | Fibre | Blue |
| 39 | 200 | Fragment | Black |
| 400 | Fragment | Light blue |
| 200 | Fragment | White |
| 40 | 300 | Fragment | Red |
| 41 | NO MICROPLASTICS FOUND | | |
| 42 | NO MICROPLASTICS FOUND | | |
| 43 | NO MICROPLASTICS FOUND | | |
| 44 | 600 | Fibre | Black |
| 45 | 1500 | Fibre | Red |
| 1100 | Fibre | Black |
| 46 | 100 | Fragment | Yellow |
| 47 | NO MICROPLASTICS FOUND | | |
| 48 | 100 | Fragment | White |
| 49 | 2100 | Fibre | Blue |
| 50 | NO MICROPLASTICS FOUND | | |
| 51 | NO MICROPLASTICS FOUND | | |
| 52 | 200 | Fibre | Blue |
| 53 | 800 | Fibre | Black |
| 54 | NO MICROPLASTICS FOUND | | |
| 55 | 200 | Fragment | Blue |
| 100 | Fragment | White |
| 56 | 300 | Fragment | Black |
| 2800 | Fibre | Black |
| 57 | NO MICROPLASTICS FOUND | | |
| 58 | NO MICROPLASTICS FOUND | | |
| 59 | NO MICROPLASTICS FOUND | | |
| 60 | NO MICROPLASTICS FOUND | | |
| 61 | 3400 | Fibre | Black |
| 2100 | Fibre | Black |
| 62 | 600 | Fibre | Blue |
| 63 | NO MICROPLASTICS FOUND | | |
| 64 | NO MICROPLASTICS FOUND | | |
| 65 | 600 | Fibre | Light blue |
| 66 | 1800 | Fibre | Black |
